# Supplementary material for: Bacterial Lipopeptides Are Effective against Pear Fire Blight
Source: MDPI journal article supplement (doi:10.3390/microorganisms12050896), 2024-04-29
Supplement: s1 [file s1]

# Supplementary Information

Table S1. primers used to detect gene for biological control in *B. subtilis* and *P. megaterium*

| S/No | Gene         | Primer name | Primer sequence (5'-3')     | Annealing Temp | Size (bp) | Reference                 |
|------|--------------|-------------|-----------------------------|----------------|-----------|---------------------------|
| 1    | <i>Spas</i>  | Spas-F      | GGTTTGGTGGATGGAGCTGT        | 58 °C          | 375       | Song Wenxin (2020)        |
|      |              | Spas-R      | GCAAGGAGTCAGAGCAAGGT        |                |           |                           |
| 2    | <i>fenD</i>  | FNDF1       | CCT GCA GAA GGA GAA GTG AAG | 52 °C          | 293       | Joshi, R., et al. (2006). |
|      |              | FNDR1       | TGC TCA TCG TCT TCC GTT TC  |                |           |                           |
| 3    | <i>yndJ</i>  | 147F        | CAG AGC GAC AGC AAT CAC AT  | 52 °C          | 212       | Joshi, R., et al. (2006). |
|      |              | 147R        | TGA ATT TCG GTC CGC TTA TC  |                |           |                           |
| 4    | <i>srfAA</i> | SRFAF1      | GAA AGA GCG GCT GCT GAA AC  | 62 °C          | 273       | Joshi, R., et al. (2006). |
|      |              | SRFAR1      | CCC AAT ATT GCC GCA ATG AC  |                |           |                           |
| 5    | <i>QkI</i>   | QK1-F       | CTTAAACGTCAGAGGCGGAG        | 55 °C          | 704       | Song Wenxin (2020)        |
|      |              | QK1-R       | ATTGTGCAGCTGCTTGTACG        |                |           |                           |
| 6    | <i>ItuC</i>  | ITUCF1      | TTC ACT TTT GAT CTG GCG AT  | 52 °C          | 575       | Joshi, R., et al. (2006). |
|      |              | ITUCR3      | CGT CCG GTA CAT TTT CAC     |                |           |                           |

Table S2. Chart outlining interpretive standards for zone diameter, used to determine the sensitivity and resistance status of antibiotics through the disk diffusion method <sup>[39]</sup>.

| S/no | Name of antibiotics (dose) | Inhibitory zone diameter to nearest millimeter (mm) |                           |               |
|------|----------------------------|-----------------------------------------------------|---------------------------|---------------|
|      |                            | Sensitive (S)                                       | Moderately sensitive (MS) | Resistant (R) |
| 1    | Cefthiopene (30 µg/disk)   | ≥18mm                                               | 15–17 mm                  | ≤14 mm        |
| 2    | Kanamycin (30 µg/disk)     | ≥18mm                                               | 14–17 mm                  | ≤13 mm        |
| 3    | Streptomycin (10 µg/disk)  | ≥15mm                                               | 12–14 mm                  | ≤11 mm        |
| 4    | Erythromycin (15 µg/disk)  | ≥23mm                                               | 14–22 mm                  | ≤13 mm        |
| 5    | Ciprofloxacin (15 µg/disk) | ≥21mm                                               | 16–20 mm                  | ≤15 mm        |
| 6    | Tetracycline (30 µg/disk)  | ≥15mm                                               | 12–14 mm                  | ≤11 mm        |
| 7    | Penicillin (10 µg/disk)    | ≥14mm                                               | 00–00 mm                  | ≤15 mm        |
| 8    | Ampicillin (10 µg/disk)    | ≥13mm                                               | 14–16 mm                  | ≤17 mm        |



## Supplementary Information

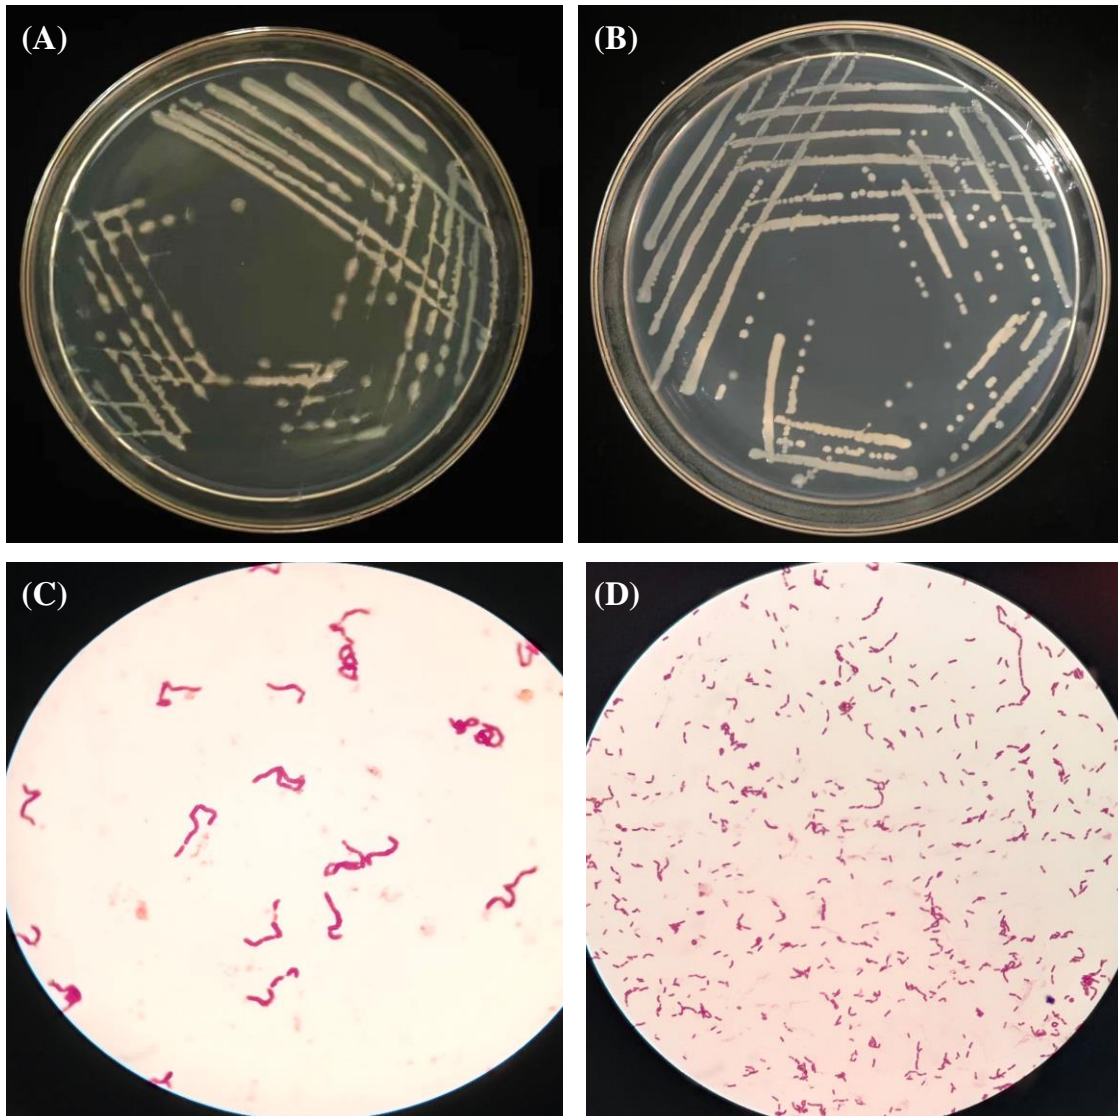

Figure S1. Streaking and pure NB agar plate of Isolate (A). *P. megaterium* H1, (B). *B. subtilis* I2. Morphology of (C). *P. megaterium* H1 (D). *B. subtilis* I2 light-microscope photomicrograph showing the rod form



## Supplementary Information

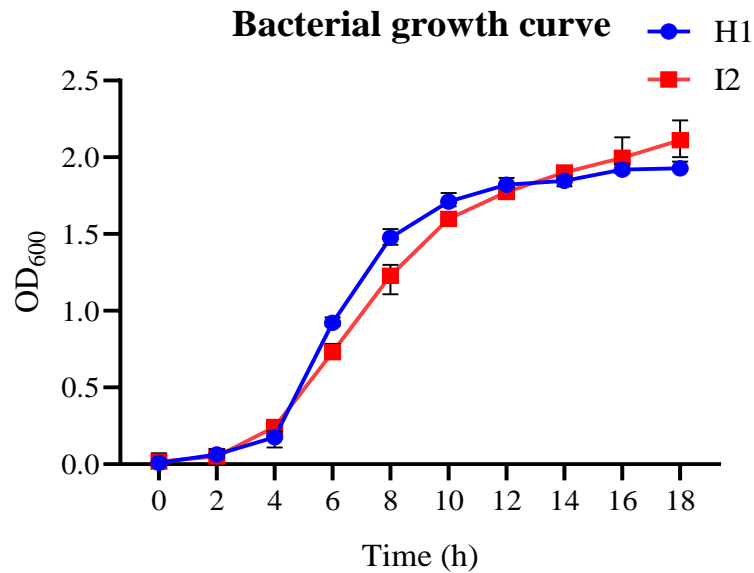

Figure S2. Antagonist bacteria growth curve in different intervals

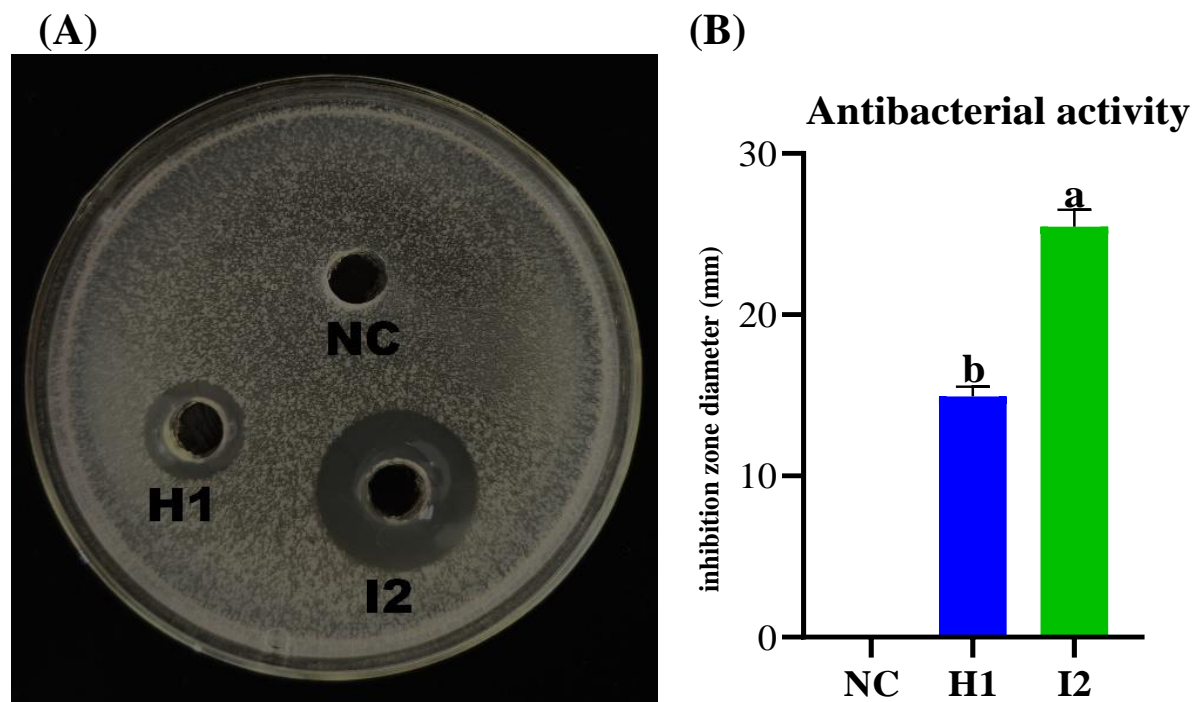

Figure S3. **(A)**: Screening and inhibition of *E. amylovora* by antagonistic bacteria filtrate. **(B)**: Diameter of inhibition zone of antagonist strains filtrate.
